# Supplementary material for: A mediation analysis on the relationship between dietary glycemic load, obesity and cardiovascular risk factors in children
Source: Springer Nature journal article supplement (doi:10.1038/s41366-021-00958-4), 2022-01-23
Supplement: 41366_2021_958_MOESM1_ESM.pdf [file 41366_2021_958_MOESM1_ESM.pdf]

**Suissa K, et al., A mediation analysis on the relationship between dietary glycemic load, obesity and cardiovascular risk factors in preschool children.**

**SUPPLEMENTAL METHODS**

First, we estimated the total effect of GI and GL on TG and HDL on the additive scale (note that X hereby denotes both GI and GL and Y hereby denotes different outcomes including TG and HDL). To this end, we regressed  $Y_i$  on  $X_i$  and confounders ( $C_i$ ) as such:

$$E[Y|X,C] = \beta_0 + \beta_1 X_i + \beta_2 C_i \quad (\text{Model 1})$$

$\beta_1$  from model 1 will be the estimate of the total effect provided that the measured confounders are sufficient to control for the confounders of the X-Y relation. Second, we estimated the direct effect of X on Y using the conventional approach described by Baron and Kenny.<sup>1</sup> For this, we regressed each outcome Y on X, C and adiposity (the mediator M) by fitting a linear regression model as such:

$$E[Y|X,C,M] = \beta_0 + \beta_1 X_i + \beta_2 C_i + \beta_3 M_i \quad (\text{Model 2})$$

$\beta_1$  from model 2 will be the estimate of the direct effect of X that is not mediated through M, provided that the measured confounders that are adjusted for are sufficient to control for the confounders of the relation between X and Y. Third, we tested for interaction by including interaction terms between X and M in model 2, and because these terms were not statistically significant they were dropped from the model.

Next, we assessed mediation following the causal approach: For this, we computed the controlled direct effect using a weighted generalized estimating equation (GEE) to estimate the weighted marginal structural model (MSM), an approach proposed by VanderWeele<sup>2</sup> and Valeri<sup>3</sup> for continuous exposure, mediators and outcomes.<sup>4</sup> The following model was fitted:

$$g(\mu) = \beta_0 + \beta_1 X_i + \beta_2 M_i + \beta_3 X_i M_i \quad (\text{Model 3})$$

where  $g$  was a monotone link function. In this case, the continuous outcome followed a linear link function. Inverse probability weights were used to balance covariates and hence control for confounding between  $X$  and  $Y$  and  $M$  and  $Y$ . Weights were constructed for both exposure variables (glycemic index and glycemic load) and the mediators (continuous BMI z-score and percent fat mass). We used stabilized weights, which are preferred to standard weights because they are considered more stable; and because of the continuous nature of  $X$  and  $M$ , unstabilized weights would have infinite variance.<sup>5</sup> For the continuous exposure and mediator variables, we used the density function of  $X$  in the numerator and the density function of  $X$  adjusted for confounders  $C$  as the denominator for the  $X$ - $Y$  weights and repeated the same method for the  $M$ - $Y$  weights.<sup>5</sup> The final weight used in the MSM was obtained by calculating the product of the two stabilized weights for each participant.

The controlled direct effect (CDE) for a change in exposure from level  $x^*$  to level  $x$  was obtained as follows with estimates from the final weighted model (model 3):

$$\text{CDE} = (\beta_1 + \beta_3 m)(x - x^*)$$

The CDE is an estimate of how much the mean of the outcome changes when the mediator is kept constant at a level  $m$  uniformly in the population while the exposure changes from level  $x^*$  to level  $x$ . Although sometimes unrealistic, a requirement for the CDE is that an intervention be effective at setting every subject to having the same value of the mediator. In general,  $m$  would be set as the mean BMI z-score or percent fat mass in the study sample. For the purpose of this study, CDE was equal to  $\beta_1$  because the interaction term  $\beta_3$  was not significant.

## **REFERENCES**

1. Baron RM, Kenny DA. The moderator-mediator variable distinction in social psychological research: conceptual, strategic, and statistical considerations. *Journal of personality and social psychology* 1986; **51**(6): 1173-82.
2. VanderWeele TJ. Marginal structural models for the estimation of direct and indirect effects. *Epidemiology (Cambridge, Mass.)* 2009; **20**(1): 18-26.
3. Valeri L, Lin X, VanderWeele TJ. Mediation analysis when a continuous mediator is measured with error and the outcome follows a generalized linear model. *Statistics in medicine* 2014; **33**(28): 4875-90.
4. Robins JM, Hernan MA, Brumback B. Marginal structural models and causal inference in epidemiology. *Epidemiology (Cambridge, Mass.)* 2000; **11**(5): 550-60.
5. Van der Wal WM, Geskus RB. An R package for inverse probability weighting. *J Stat Software* 2011; **43**(13): 1-23.
